# Supplementary material
Source: bioRxiv or medRxiv preprint supplement (https://www.biorxiv.org/highwire/filestream/68756/field_highwire_adjunct_files/0/178160-1.pdf)
Supplement: Supplementary file [file 178160-1.pdf]

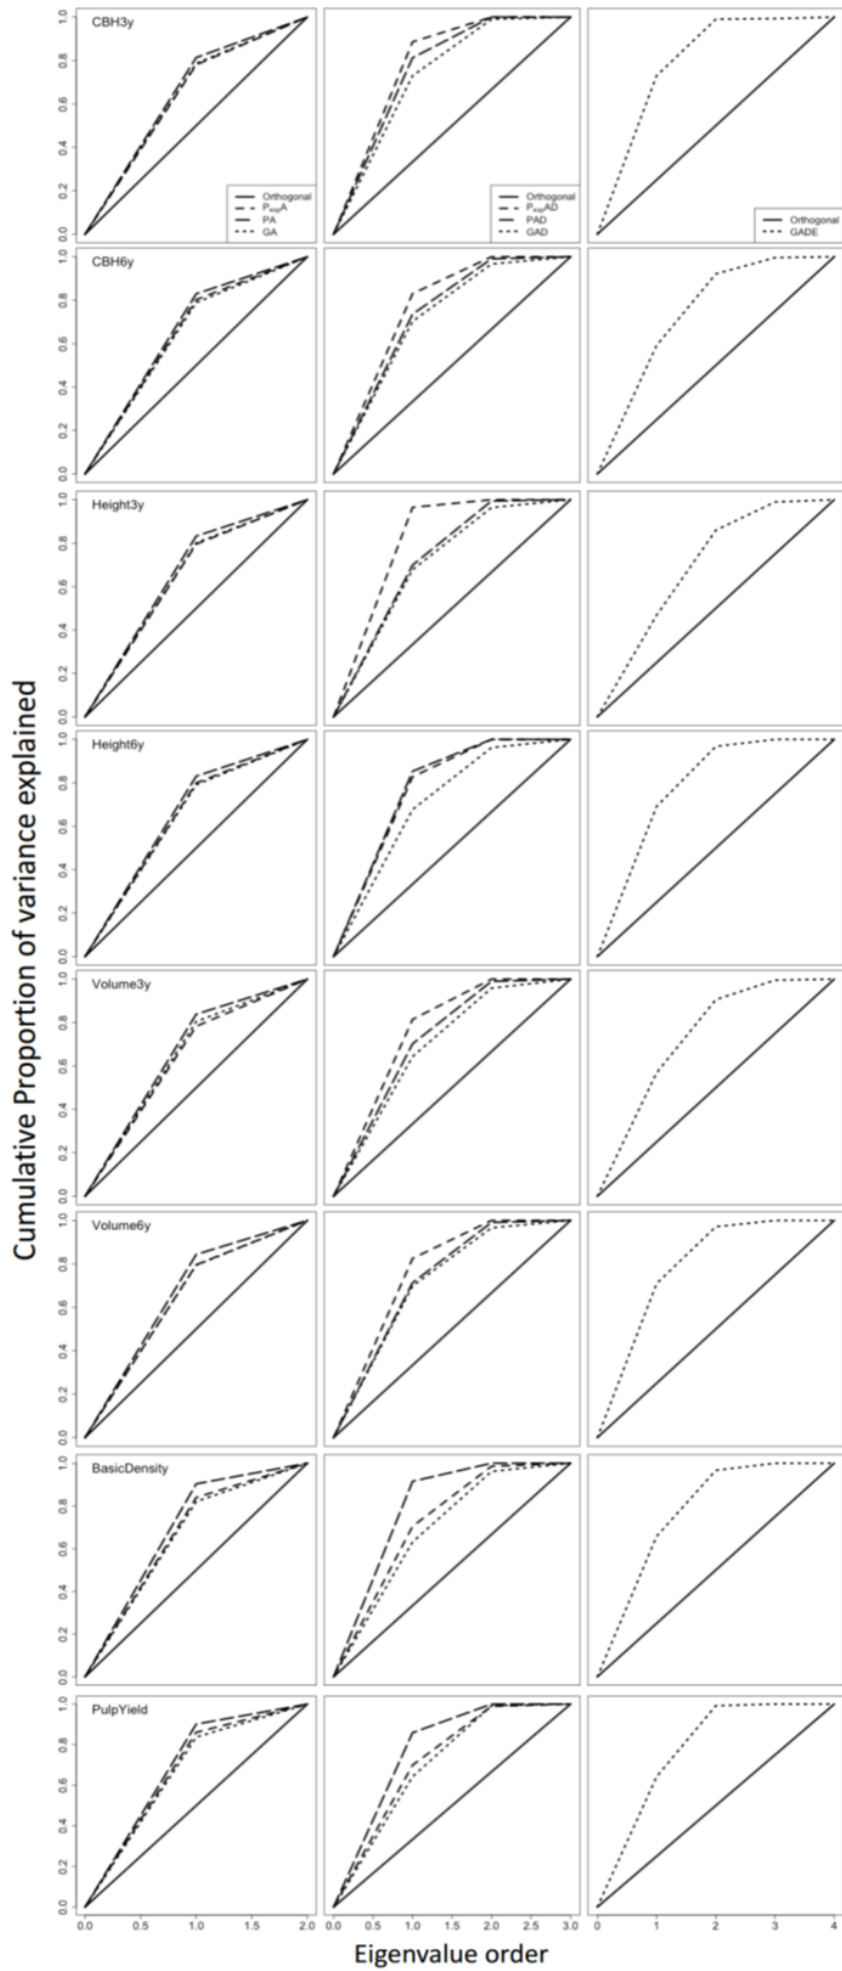

**Figure S1.** Cumulative proportion of variance explained by eigenvalues for models for each of the eight traits. The models considered are only additive effects from the registered pedigree ( $P_{exp}A$ ), pseudo-pedigree (PA) and genomics-based relationships (GA) (left); additive and dominance interaction from registered pedigree ( $P_{exp}AD$ ), pseudo-pedigree (PAD) and genomics-based relationships (GAD) (middle panels); additive, dominance and epistasis interaction from and genomics-based relationships (GAD) (right panels). The diagonal represents an orthogonal correlation matrix where no confounding occurs between variance components.

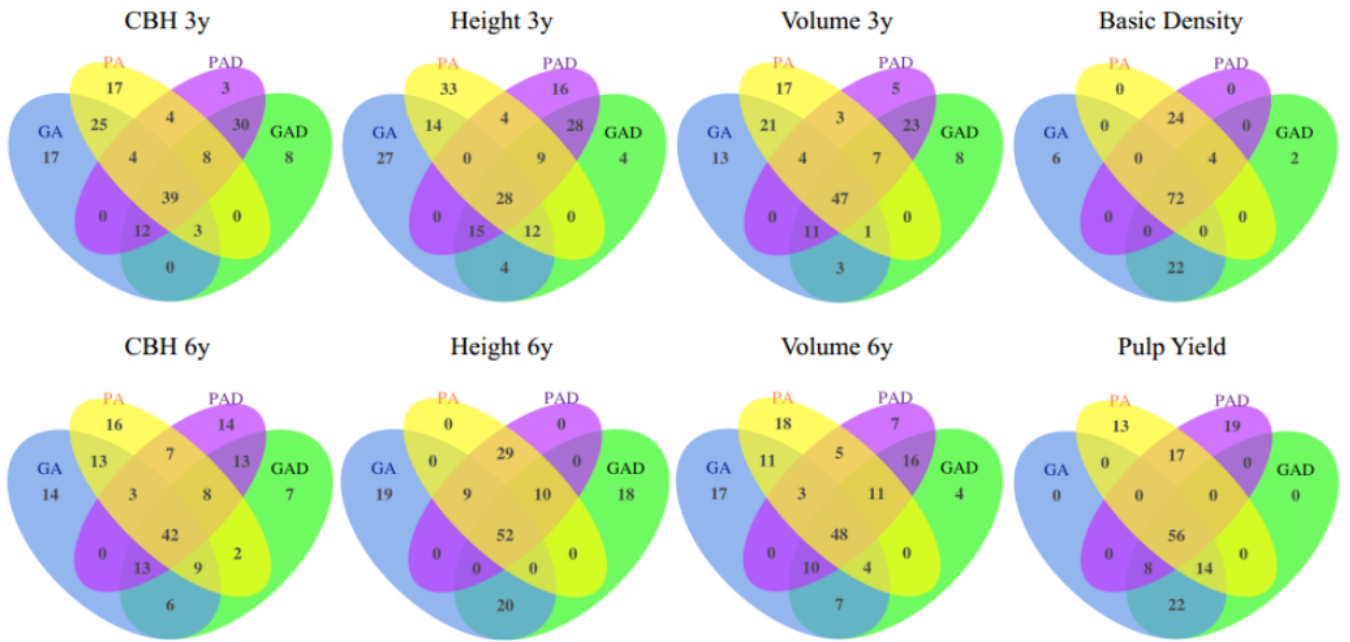

**Figure S2.** Plots of overlap numbers for the top 100 performing individuals for eight traits, comparing results from GA, GAD, PA and PAD models.

**Table S1.** Model fit of breeding and genetic values

| Trait         | Model | Matrix                              |                                     |                                     |                                     |                                     |                                     |
|---------------|-------|-------------------------------------|-------------------------------------|-------------------------------------|-------------------------------------|-------------------------------------|-------------------------------------|
|               |       | G                                   |                                     | P                                   |                                     | P <sub>exp</sub>                    |                                     |
|               |       | $r(\hat{A}_{full}, \hat{Y}_{full})$ | $r(\hat{G}_{full}, \hat{Y}_{full})$ | $r(\hat{A}_{full}, \hat{Y}_{full})$ | $r(\hat{G}_{full}, \hat{Y}_{full})$ | $r(\hat{A}_{full}, \hat{Y}_{full})$ | $r(\hat{G}_{full}, \hat{Y}_{full})$ |
| CBH3y         | A     | 0.629*                              | -                                   | 0.679                               | -                                   | 0.599                               | -                                   |
|               | AD    | 0.612                               | 0.754                               | 0.64                                | 0.978                               | 0.599                               | 0.599                               |
|               | ADE   | 0.575                               | <b>0.985</b>                        | -                                   | -                                   | -                                   | -                                   |
| CBH6y         | A     | 0.669                               | -                                   | 0.717                               | -                                   | 0.664                               | -                                   |
|               | AD    | 0.677                               | 0.829                               | 0.698                               | <b>0.961</b>                        | 0.664                               | 0.664                               |
|               | ADE   | 0.664                               | 0.908                               | -                                   | -                                   | -                                   | -                                   |
| Height3y      | A     | 0.685                               | -                                   | 0.721                               | -                                   | 0.614                               | -                                   |
|               | AD    | 0.659                               | 0.865                               | 0.686                               | <b>1</b>                            | 0.609                               | 0.941                               |
|               | ADE   | 0.617                               | 0.975                               | -                                   | -                                   | -                                   | -                                   |
| Height6y      | A     | 0.674                               | -                                   | 0.727                               | -                                   | 0.656                               | -                                   |
|               | AD    | 0.673                               | <b>0.811</b>                        | 0.727                               | 0.727                               | 0.656                               | 0.656                               |
|               | ADE   | 0.673                               | 0.811                               | -                                   | -                                   | -                                   | -                                   |
| Volume3y      | A     | 0.689                               | -                                   | 0.736                               | -                                   | 0.603                               | -                                   |
|               | AD    | 0.672                               | 0.804                               | 0.711                               | <b>0.97</b>                         | 0.603                               | 0.603                               |
|               | ADE   | 0.643                               | 0.965                               | -                                   | -                                   | -                                   | -                                   |
| Volume6y      | A     | 0.673                               | -                                   | 0.748                               | -                                   | 0.638                               | -                                   |
|               | AD    | 0.659                               | 0.843                               | 0.738                               | 0.937                               | 0.638                               | 0.638                               |
|               | ADE   | 0.648                               | 0.922                               | -                                   | -                                   | -                                   | -                                   |
| Basic Density | A     | 0.775                               | -                                   | 0.881                               | -                                   | 0.751                               | -                                   |
|               | AD    | 0.764                               | 0.822                               | 0.881                               | <b>0.881</b>                        | 0.742                               | 0.857                               |
|               | ADE   | 0.764                               | 0.822                               | -                                   | -                                   | -                                   | -                                   |
| Pulp Yield    | A     | 0.842                               | -                                   | 0.874                               | -                                   | 0.801                               | -                                   |
|               | AD    | 0.842                               | 0.842                               | 0.877                               | <b>0.992</b>                        | 0.79                                | 0.988                               |
|               | ADE   | 0.842                               | 0.842                               | -                                   | -                                   | -                                   | -                                   |

\*Model fit: correlation between phenotypes and breeding values/genetic values of full data set
